# Supplementary material for: CtIP is essential for telomere replication
Source: PubMed Central journal article supplement — Nucleic Acids Res. 2019 Aug 5;47(17):8927–40. doi: 10.1093/nar/gkz652 (PMC6755089; doi:10.1093/nar/gkz652), 2019-08-05
Supplement: gkz652_supplemental_files.pdf [file gkz652_supplemental_files.pdf]

# S1

A

sgRNA

ATATTAAAGCAAGATGAGCATCTCAGGAAGCAGCTGTGGAAGCCCGAATTCCTGCAGATACATCTAGTGACTTTAAGGACCTTTTGACAA

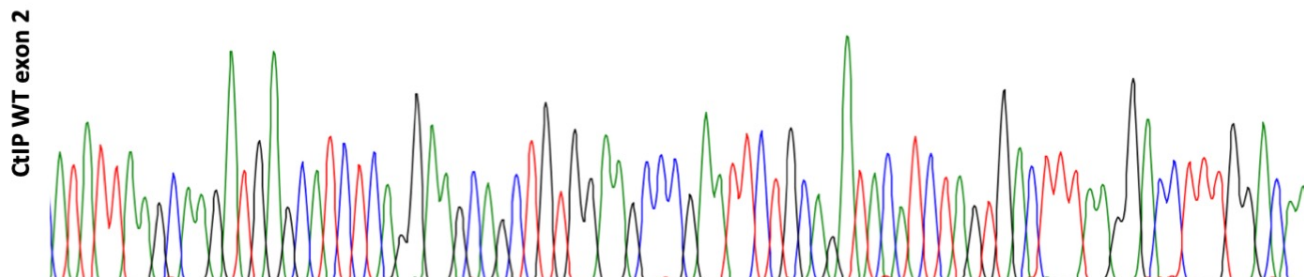

B

8 bp deletion

ATATTAAAGCAAGATGAACATCTCGGGAAAGTAGCTGTGGAAGCCCTAAATACATCTAGTGACTTTAAGGACCTTTTGACAAAACTAAAA

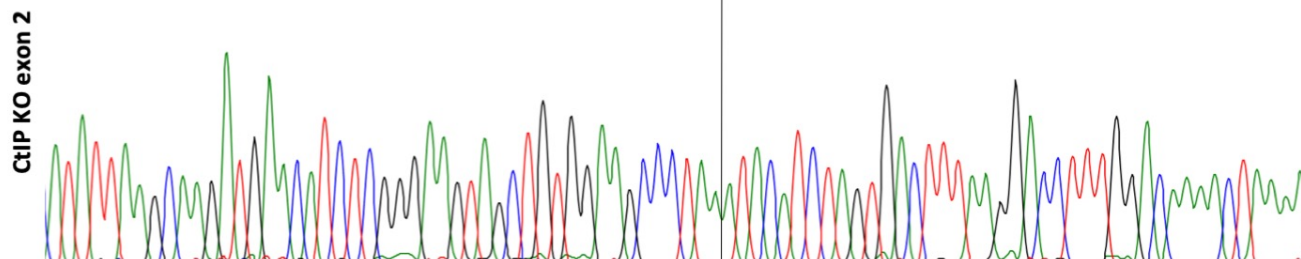

C

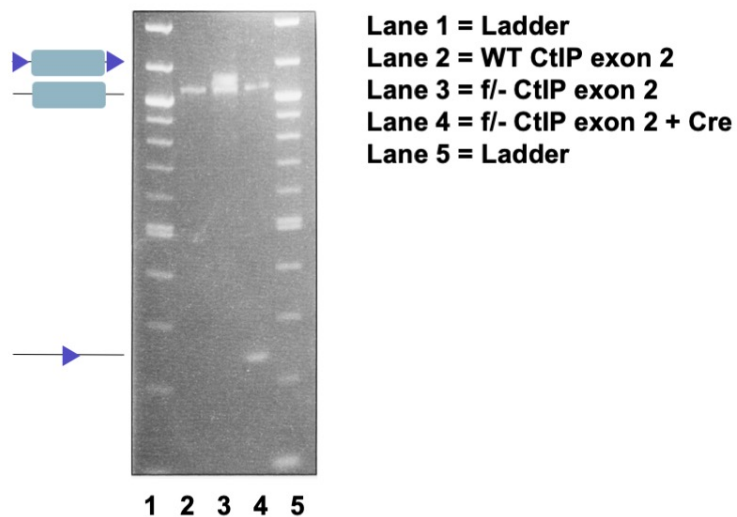

**Figure S1.** CtIP targeting strategy. (A) Partial sequence of the CtIP WT exon 2 with the sgRNA site highlighted in purple; the PAM site is highlighted in blue. (B) CRISPR-Cas9-induced 8 bp frameshift mutation in the non-floxed exon 2. (C) PCR confirmation of the floxed allele.

A

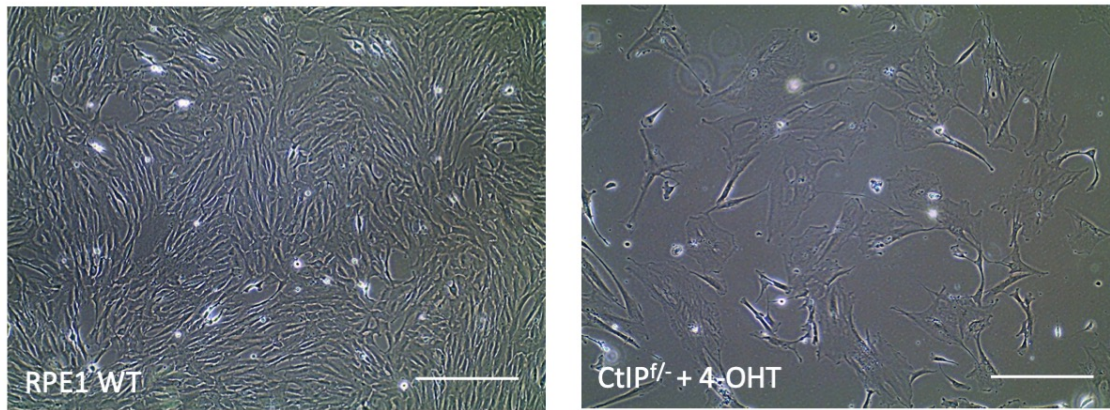

B

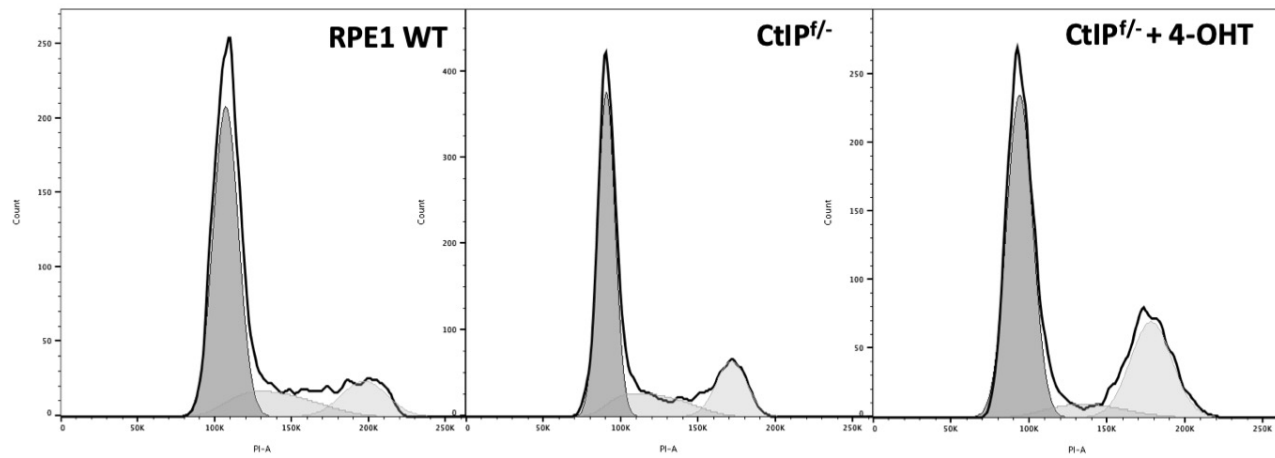

C

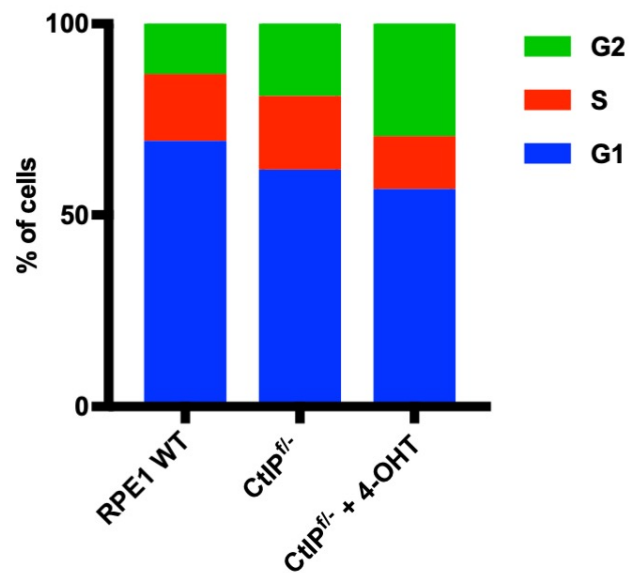

**Figure S2.** Loss of CtIP results in a G2 arrest. (A) Representative images of RPE1 WT cells and CtIP-null cells. (B) Cell cycle profiles of asynchronous cells stained with propidium iodide 2 days after 4-OHT or vehicle treatment. (C) Quantification of (B).

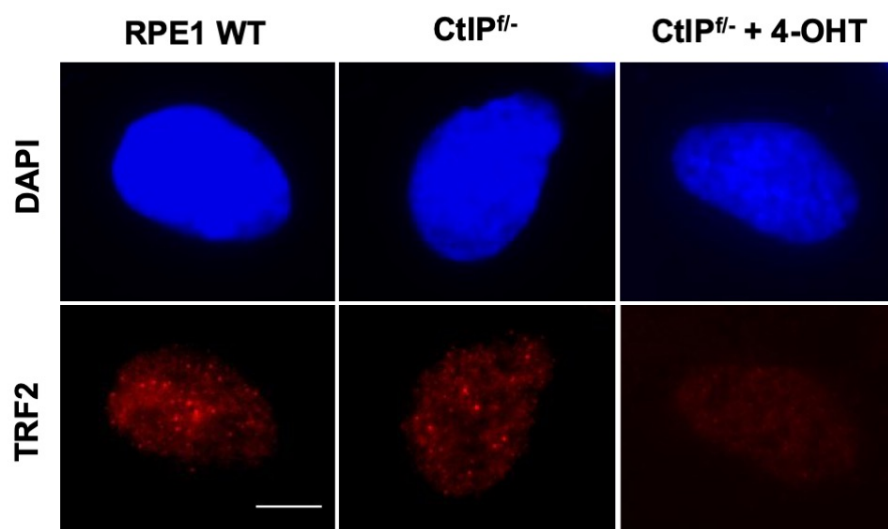

**Figure S3.** CtIP-deficient cells do not form TRF2 foci. IF staining of TRF2 in RPE1 WT, CtIP<sup>fl/-</sup>, CtIP<sup>fl/-</sup> + 4-OHT.

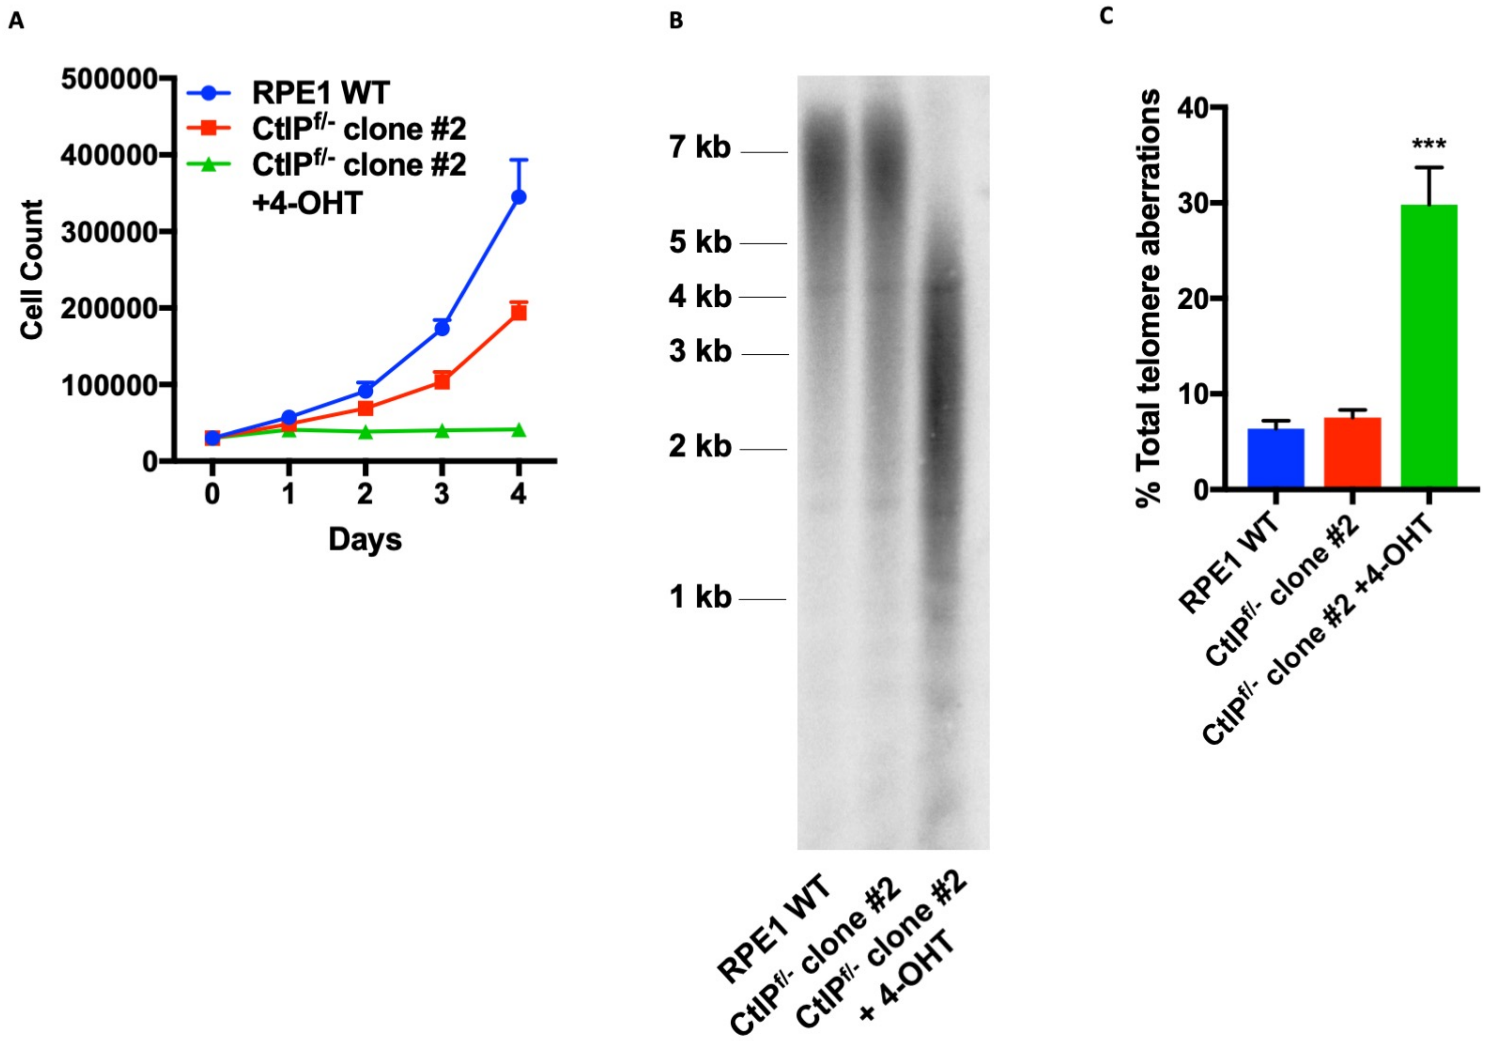

**Figure S4.** Characterization of an independently generated CtIP<sup>fl-</sup> clone. (A) Growth curve analysis of RPE1 WT, CtIP<sup>fl-</sup> #2, and CtIP<sup>fl-</sup> #2 +4-OHT. (B) TRF analysis of RPE1 WT, CtIP<sup>fl-</sup> #2, and CtIP<sup>fl-</sup> #2 +4-OHT after 2 days. (C) Quantification of total telomere aberrations by T-FISH analysis of RPE1 WT, CtIP<sup>fl-</sup> #2, and CtIP<sup>fl-</sup> #2 +4-OHT after 2 days. The aberrations scored include signal-free ends, fusions, breaks with telomeres, and internalized telomere signals; n = 2,000.

**S5**

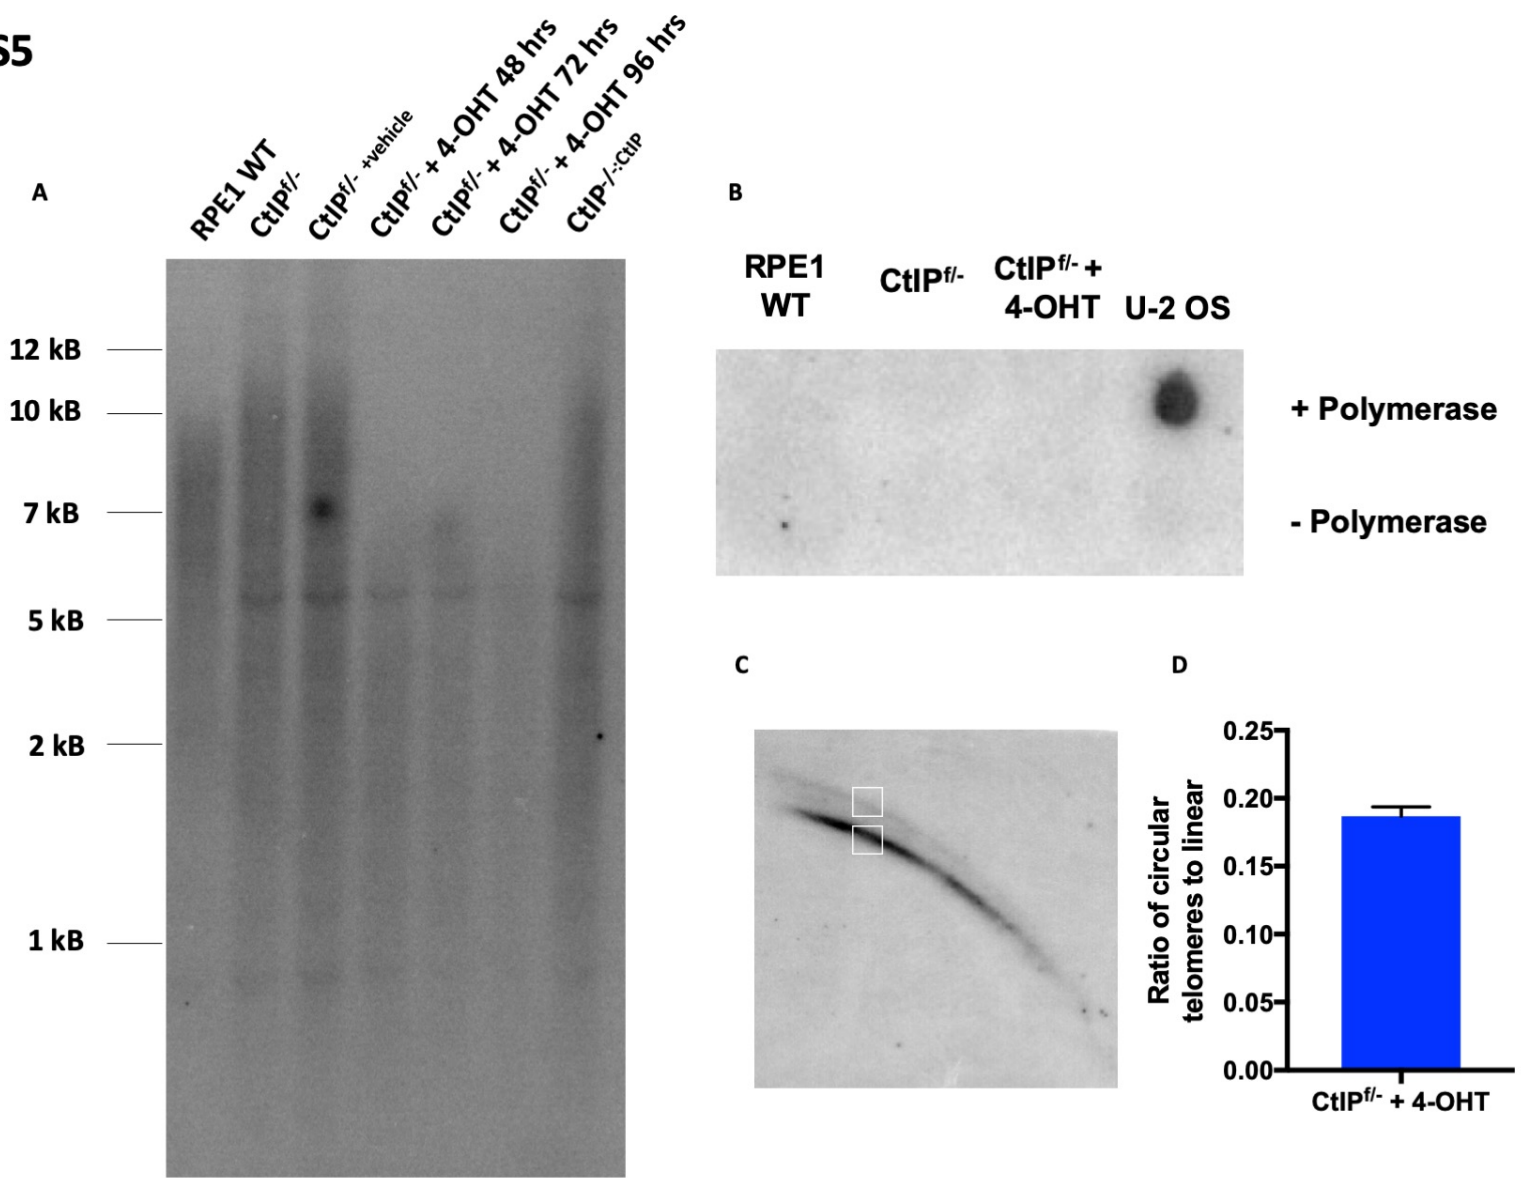

**Figure S5.** Telomere defects in the absence of CTIP. (A) TRF analysis of RPE1 WT, CtIP<sup>fl/-</sup>, CtIP<sup>fl/-</sup> + 4-OHT at varied time points, and CtIP<sup>fl/-</sup>-CtIP. (B) C-circle analysis of RPE1 WT, CtIP<sup>fl/-</sup>, CtIP<sup>fl/-</sup> + 4-OHT, and U-2 OS cells. (C) Representative image of how densitometry was calculated on 2D telomere gels. (D) Quantification of densitometry analysis of circular telomeres to linear telomeres in CtIP<sup>fl/-</sup> + 4-OHT.



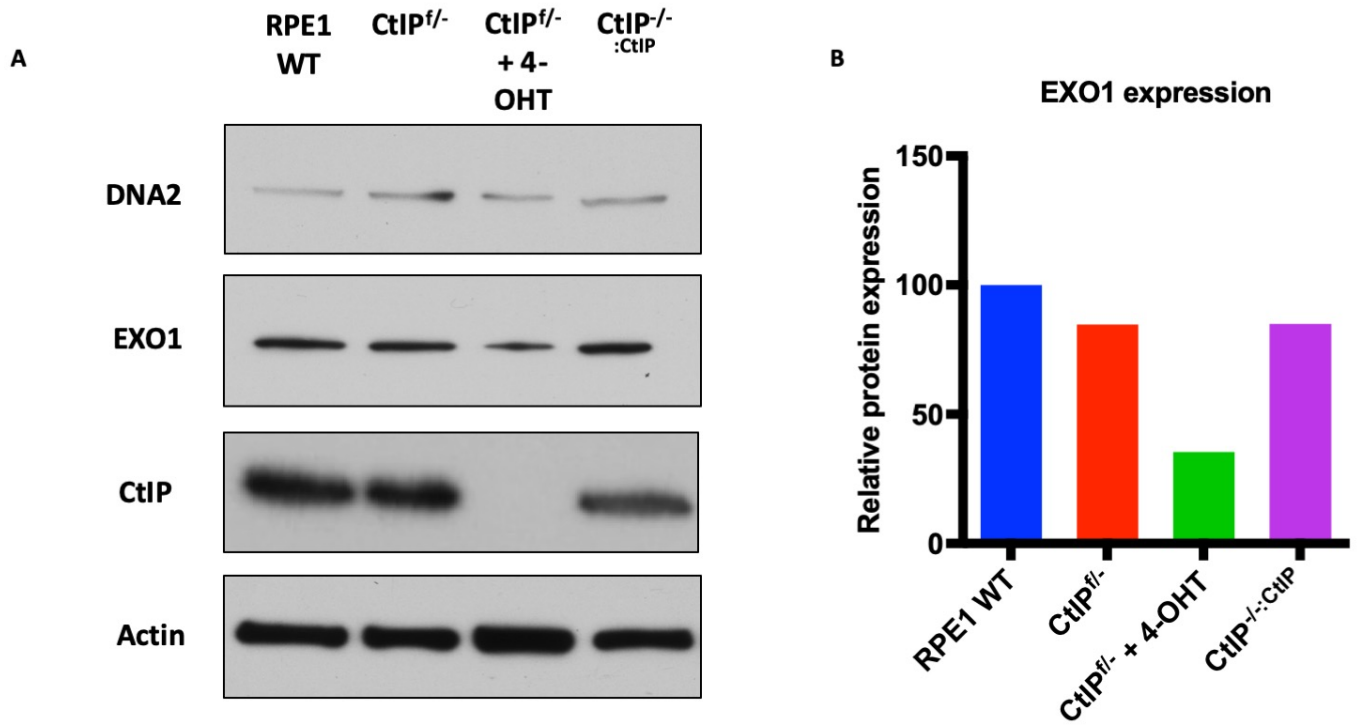

**Figure S6.** EXO1 expression decreases in the absence of CtIP. (A) Western blot analysis of DNA2, EXO1, and CtIP with actin as a loading control. (B). Quantification of EXO1 protein expression from (A).

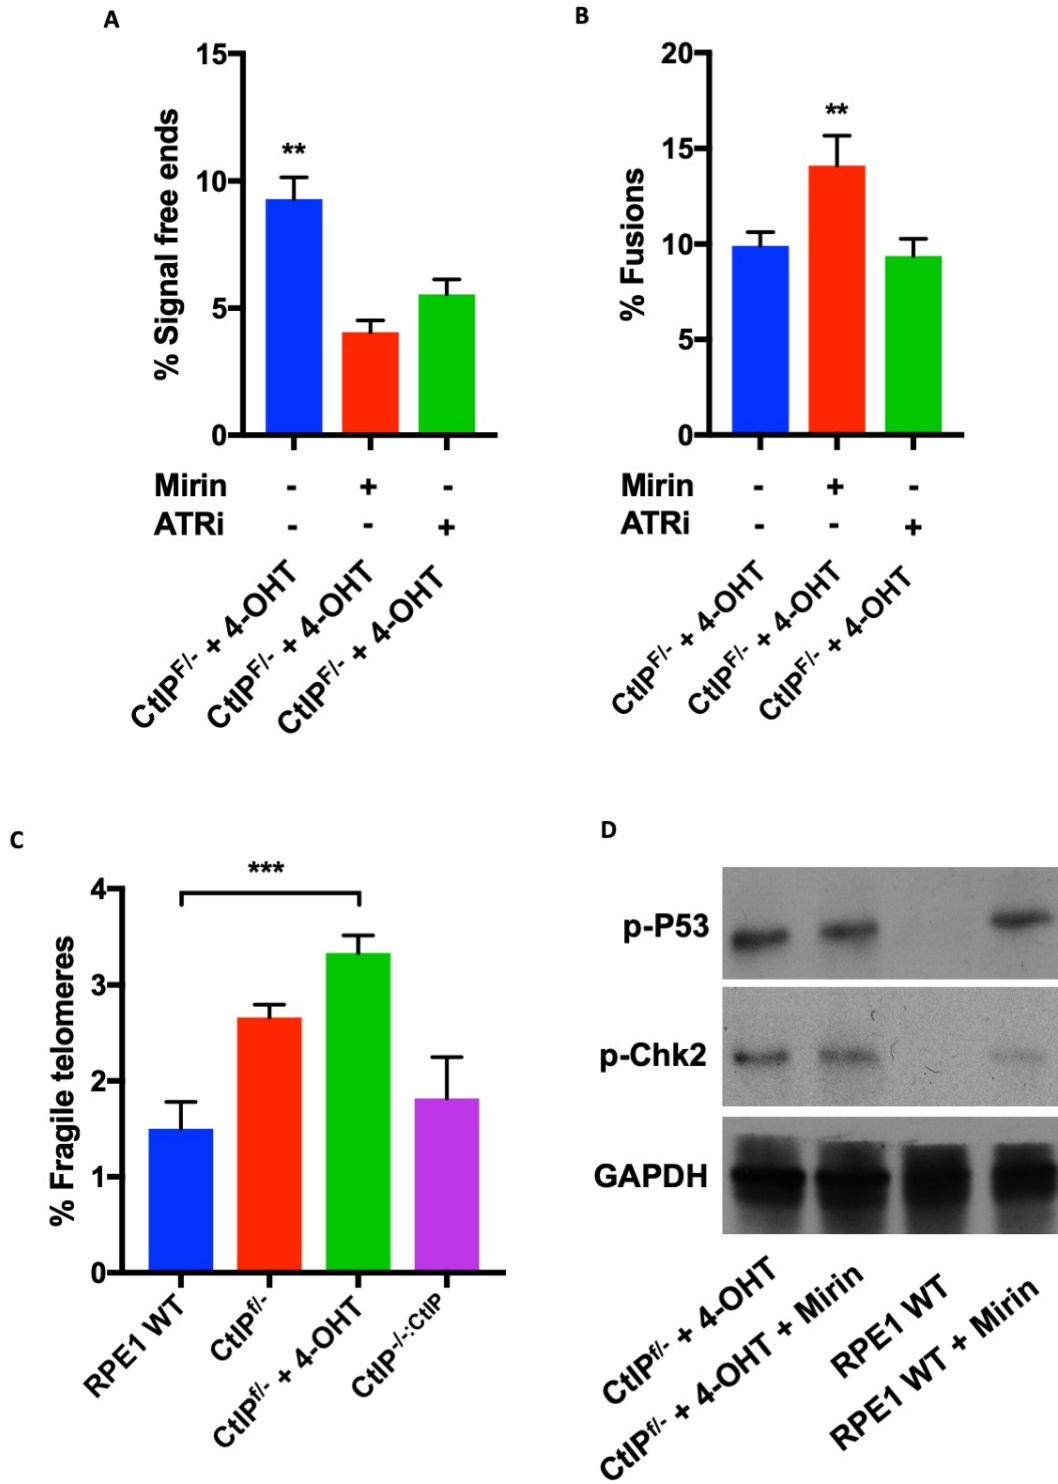

**Figure S7.** Individual telomere defects in the absence of CtIP. (A) Quantification of signal-free ends in CtIP<sup>fl/-</sup> cells after treatment with 4-OHT for 36 hr and Mirin or ATRi for 24 hr. The data from 3 independent experiments is shown,  $n = 1,750$ ; one way ANOVA and Tukey's test were used with  $p < .01 = **$ . (B) Quantification of all fusions in CtIP<sup>fl/-</sup> cells after treatment with 4-OHT for 36 hr and Mirin or ATRi for 24 hr. The data from 3 independent experiments is shown,  $n = 1,750$ ; one way ANOVA and Tukey's test were used with  $p < .01 = **$ . (C) Quantification of fragile telomeres in RPE1 WT, CtIP<sup>fl/-</sup>, CtIP<sup>fl/-</sup> + 4-OHT, and CtIP<sup>-/-</sup>:CtIP. The data from 3 independent experiments is shown.  $n = 2,200$ ; one way ANOVA and Tukey's test,  $p < .001 = ***$ . (D) Western blot analysis of phospho-Chk2 and phospho-p53 in RPE1 WT and CtIP<sup>fl/-</sup> + 4-OHT with or without Mirin treatment for 24 hr.

# S8

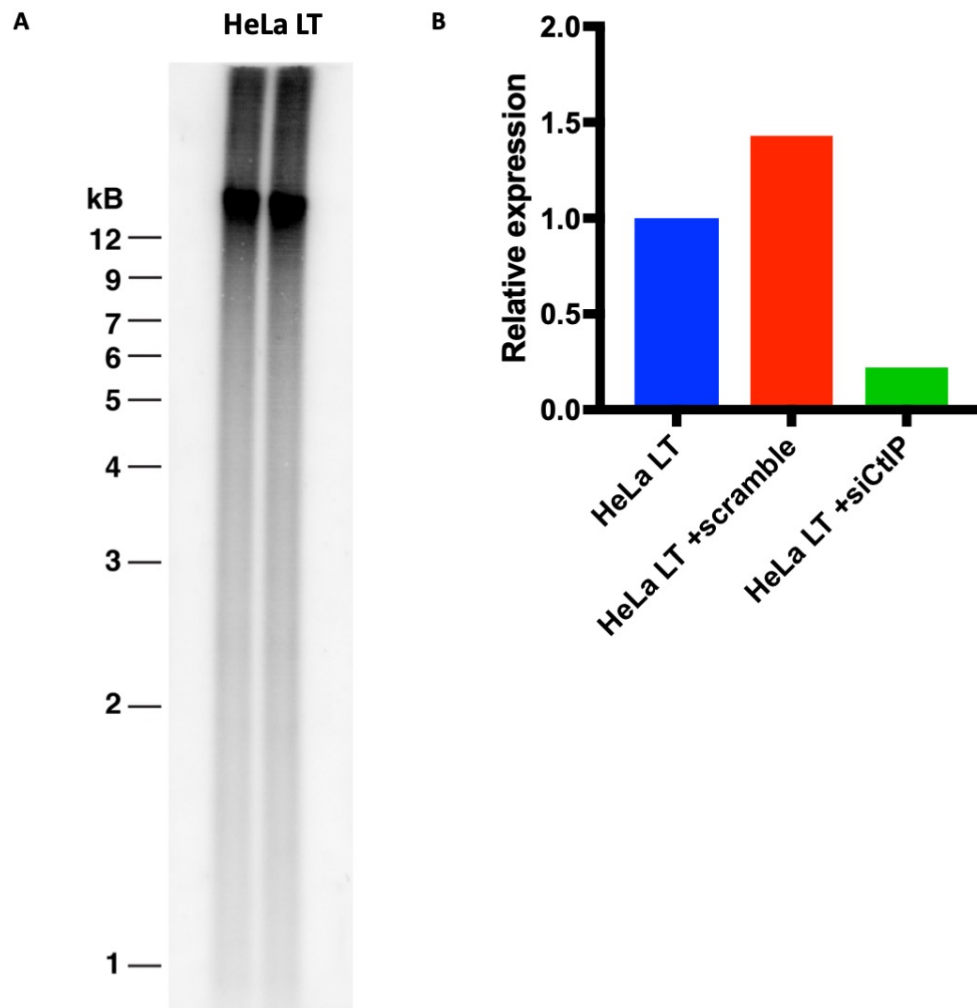

**Figure S8.** HeLa LT as a tool for telomere combing. (A) TRF of WT HeLa LT. (B) Quantification of CtIP knockdown in HeLa LT.



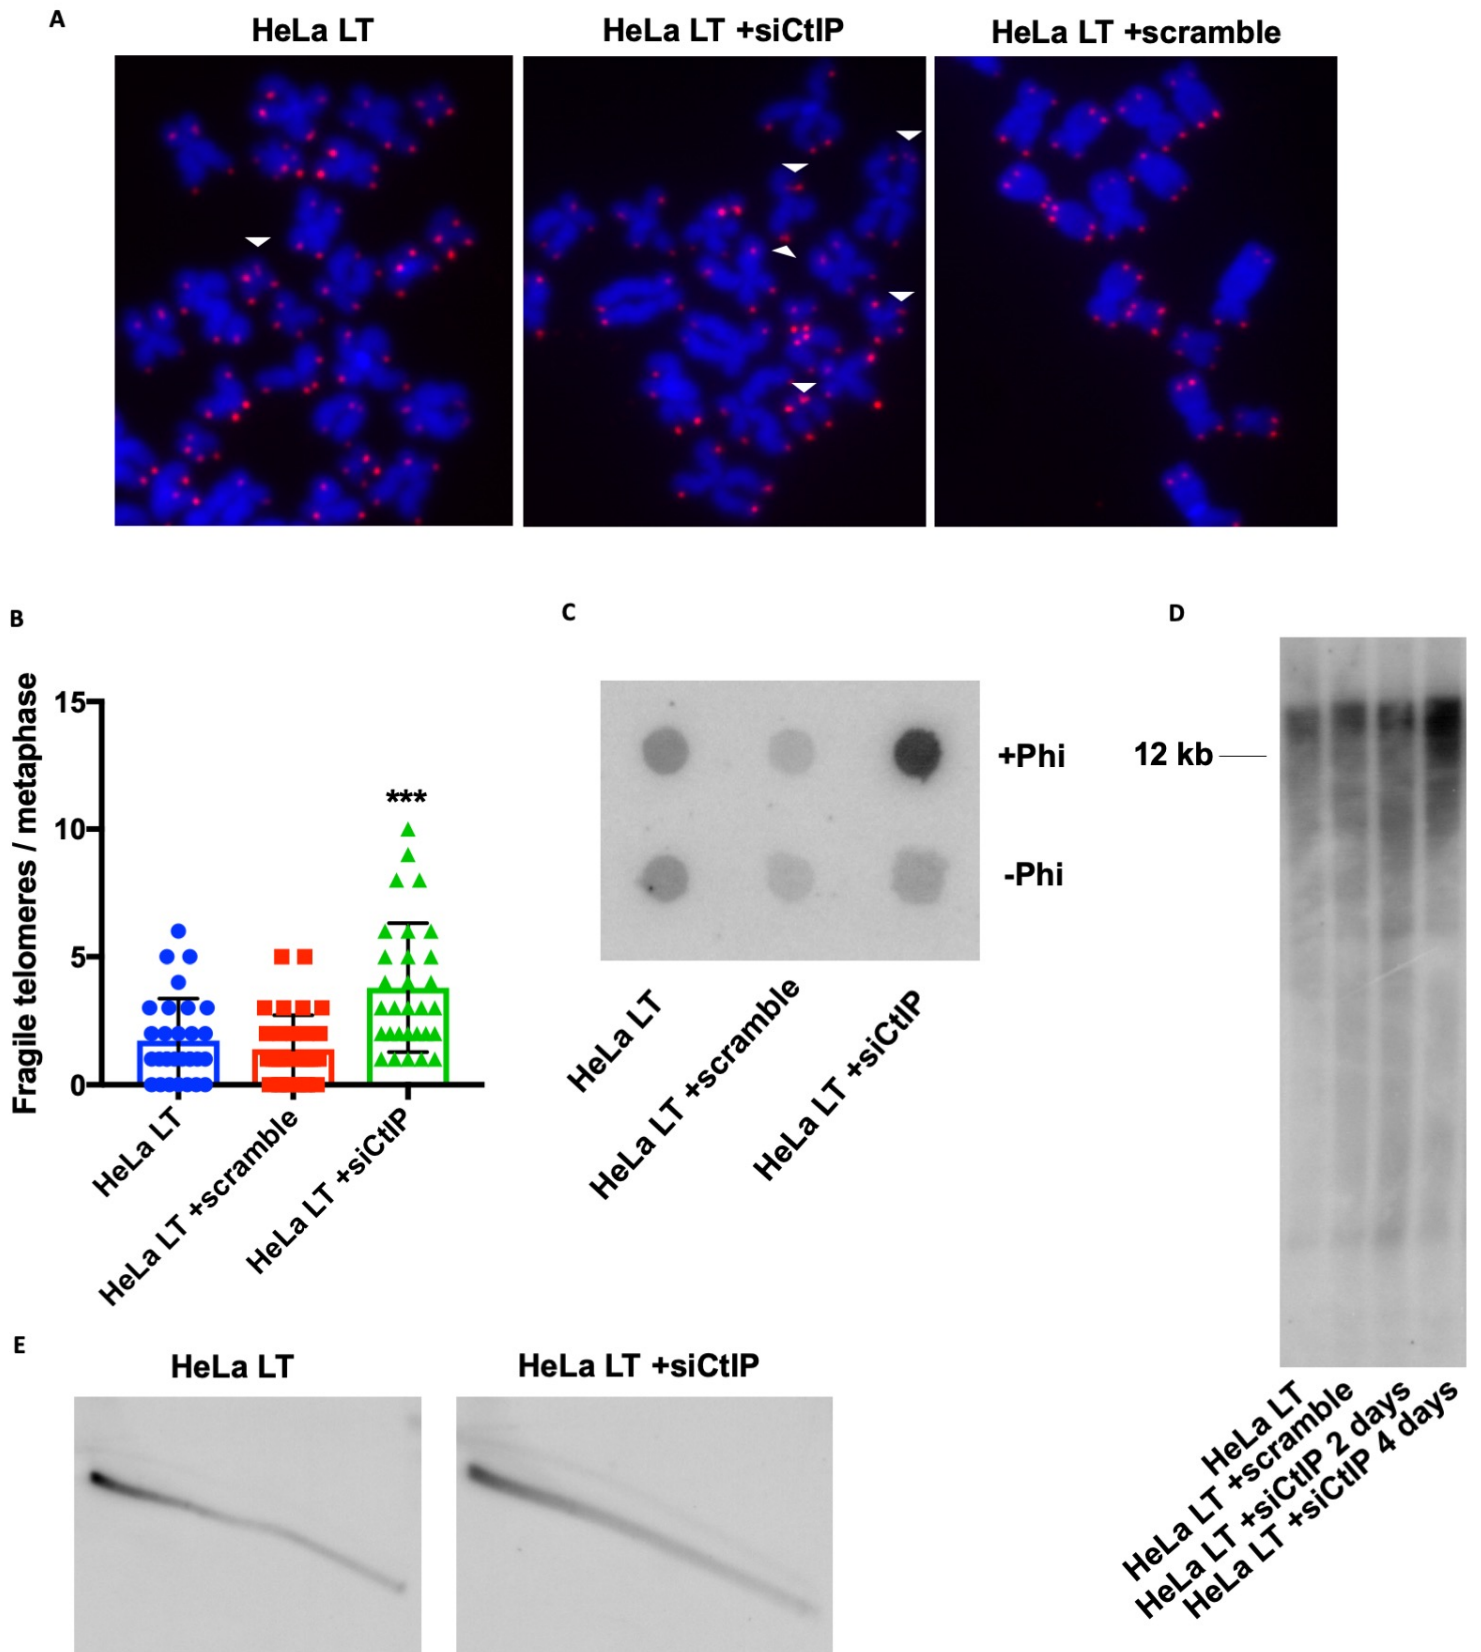

**Figure S9.** HeLa LT displays telomere abnormalities after CtIP depletion. (A) Representative images of fragile telomeres in HeLa LT, HeLa LT +scramble siRNA, and HeLa LT +siCtIP. (B). Quantification of fragile telomeres per metaphase from the T-FISH analysis (A).  $n = 30$  metaphases. (C) C-circle quantification in HeLa LT, HeLa LT +scramble siRNA, and HeLa LT +siCtIP. (D) TRF analysis of HeLa LT, HeLa LT +scramble siRNA, and HeLa LT +siCtIP 2 days, and HeLa LT +siCtIP 4 days (double knockdown). (E) 2D gel analysis of telomeric DNA extracted from HeLa LT and HeLa LT +siCtIP for 2 days.
